# Supplementary material for: PHD2 Targeting Overcomes Breast Cancer Cell Death upon Glucose Starvation in a PP2A/B55α-Mediated Manner
Source: PubMed Central journal article supplement — Cell Rep. 2017 Mar 21;18(12):2836–44. doi: 10.1016/j.celrep.2017.02.081 (PMC5378984; doi:10.1016/j.celrep.2017.02.081), 2017-03-21
Supplement: mmc2.pdf [file mmc2.pdf]

# Cell Reports

## PHD2 Targeting Overcomes Breast Cancer Cell Death upon Glucose Starvation in a PP2A/B55 $\alpha$ -Mediated Manner

### Graphical Abstract

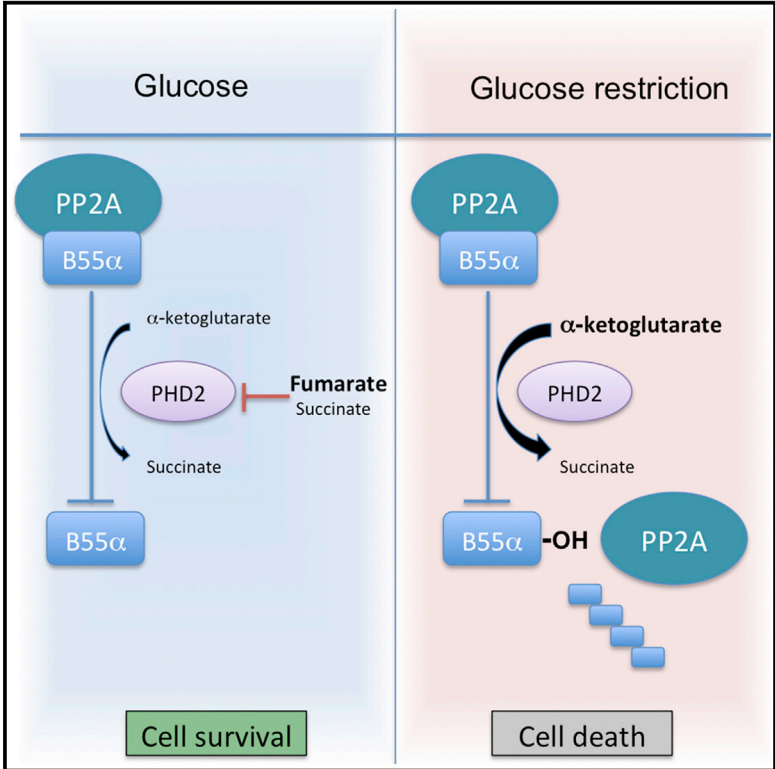

### Authors

Giusy Di Conza, Sarah Trusso Cafarello, Xingnan Zheng, Qing Zhang, Massimiliano Mazzone

### Correspondence

giusy.diconza@unil.ch (G.D.C.), massimiliano.mazzone@vib-kuleuven.be (M.M.)

### In Brief

Di Conza et al. show that, following glucose starvation, a high  $\alpha$ KG-to-fumarate ratio favors PHD2 activation that promotes apoptosis by degrading B55 $\alpha$ . In breast cancer cells, PHD2 knockdown prevents B55 $\alpha$  degradation and overcomes apoptosis in response to glucose starvation. PHD2-silenced MDA-MB231 xenografts show accumulation of B55 $\alpha$  and resistance to 2DG treatment.

### Highlights

- PHD2 hydroxylates and degrades B55 $\alpha$ , a regulatory subunit of PP2A phosphatase
- In the absence of glucose, a high  $\alpha$ KG-to-fumarate ratio favors PHD2 activation
- Active PHD2 degrades B55 $\alpha$  and promotes cell death under glucose starvation
- PHD2-silenced xenografts showed accumulation of B55 $\alpha$  and resistance to 2DG treatment

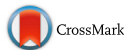

# PHD2 Targeting Overcomes Breast Cancer Cell Death upon Glucose Starvation in a PP2A/B55 $\alpha$ -Mediated Manner

Giusy Di Conza,<sup>1,2,\*</sup> Sarah Trusso Cafarello,<sup>1,2</sup> Xingnan Zheng,<sup>3</sup> Qing Zhang,<sup>3</sup> and Massimiliano Mazzone<sup>1,2,4,\*</sup>

<sup>1</sup>Laboratory of Tumor Inflammation and Angiogenesis, Vesalius Research Center, VIB, 3000 Leuven, Belgium

<sup>2</sup>Laboratory of Tumor Inflammation and Angiogenesis, Department of Oncology, KU Leuven, 3000 Leuven, Belgium

<sup>3</sup>Lineberger Comprehensive Cancer Center, University of North Carolina at Chapel Hill, 450 West Drive, Chapel Hill, NC 27599, USA

<sup>4</sup>Lead Contact

\*Correspondence: [giusy.diconza@unil.ch](mailto:giusy.diconza@unil.ch) (G.D.C.), [massimiliano.mazzone@vib-kuleuven.be](mailto:massimiliano.mazzone@vib-kuleuven.be) (M.M.)

<http://dx.doi.org/10.1016/j.celrep.2017.02.081>

## SUMMARY

B55 $\alpha$  is a regulatory subunit of the PP2A phosphatase. We have recently found that B55 $\alpha$ -associated PP2A promotes partial deactivation of the HIF-prolyl-hydroxylase enzyme PHD2. Here, we show that, in turn, PHD2 triggers degradation of B55 $\alpha$  by hydroxylating it at proline 319. In the context of glucose starvation, PHD2 reduces B55 $\alpha$  protein levels, which correlates with MDA-MB231 and MCF7 breast cancer cell death. Under these conditions, PHD2 silencing rescues B55 $\alpha$  degradation, overcoming apoptosis, whereas in SKBR3 breast cancer cells showing resistance to glucose starvation, B55 $\alpha$  knockdown restores cell death and prevents neoplastic growth in vitro. Treatment of MDA-MB231-derived xenografts with the glucose competitor 2-deoxy-glucose leads to tumor regression in the presence of PHD2. Knockdown of PHD2 induces B55 $\alpha$  accumulation and treatment resistance by preventing cell apoptosis. Overall, our data unravel B55 $\alpha$  as a PHD2 substrate and highlight a role for PHD2-B55 $\alpha$  in the response to nutrient deprivation.

## INTRODUCTION

B55 $\alpha$  is a regulatory B subunit of the phosphatase complex PP2A (Sontag, 2001). PP2A participates in an immense number of pathways, and this explains the lethal phenotype associated with knockout of the catalytic C subunit in mice (Götz et al., 1998). Few B-subunit knockout mice have been generated, and none has shown lethality; instead, these mice have tissue-specific pathological features (Louis et al., 2011; Varadkar et al., 2014). Indeed, distinct from the catalytic and scaffold subunits of PP2A, the regulatory B subunits only contribute to pathways ascribed to their specific substrates so that they act uniquely under different pathological contexts (Sablina et al., 2010). We recently found that PP2A/B55 $\alpha$  promotes the growth of colorectal cancer by dephosphorylating PHD2 and modifying

its enzymatic properties (Di Conza et al., 2017). PHD2 (or EGLN1) is a member of the hypoxia-inducible factor (HIF)-prolyl hydroxylase domain proteins (PHDs) family (Epstein et al., 2001). These enzymes are crucial for HIF activation and the cellular response to hypoxia (Chan et al., 2005). Indeed, under normoxia, PHDs utilize oxygen and  $\alpha$ -ketoglutarate ( $\alpha$ -KG) to carry out a hydroxylation reaction on specific HIF prolines that lead to ubiquitination and proteasomal degradation (Keith et al., 2011). In addition to oxygen and cosubstrates, the mTOR pathway, specifically P70S6K, can further activate PHD2 through serine-125 phosphorylation. When dephosphorylated by PP2A/B55 $\alpha$ , PHD2 shows impaired enzymatic activity, allowing full activation of HIF1 in hypoxia (Di Conza et al., 2017). Here, we investigate the molecular interaction between PHD2 and B55 $\alpha$  in response to glucose starvation in the context of breast cancer cells.

## RESULTS

### PHD2 Targets B55 $\alpha$ to the Proteasome by Promoting Its Hydroxylation

The main function of PHD2 is the hydroxylation at specific proline residues within the alpha subunit of HIFs. Based on our previous findings showing the interaction and negative regulation of PHD2 by B55 $\alpha$ /PP2A (Di Conza et al., 2017), we wondered whether PHD2 was able to degrade B55 $\alpha$  in a feed-forward loop. We found that co-overexpression of PHD2 and B55 $\alpha$  in HEK293T cells resulted in reduced B55 $\alpha$  protein levels (Figure 1A) that was linked to its increased ubiquitination (Figure 1B) and proteasomal degradation (Figure 1C). The control of B55 $\alpha$  protein levels was specific for PHD2 only, because either PHD1 or PHD3 was not able to induce B55 $\alpha$  proteasomal degradation (Figure S1A). Mirroring the overexpression data, PHD2 knockdown increased the half-life of B55 $\alpha$  as assessed by translation blockade with cycloheximide (Figures 1D and S1B). Inhibition of PHD2 enzymatic activity by IOX2 or dimethylxaloylglycine (DMOG) impaired both B55 $\alpha$  ubiquitination and degradation (Figures 1E and 1F). Moreover, physiological inhibition of PHD2 by exposure to hypoxia was able to induce B55 $\alpha$  accumulation as well (Figures S1C and S1D). Overall, these data indicate that PHD2 hydroxylase function is required for targeting B55 $\alpha$  to the proteasome.

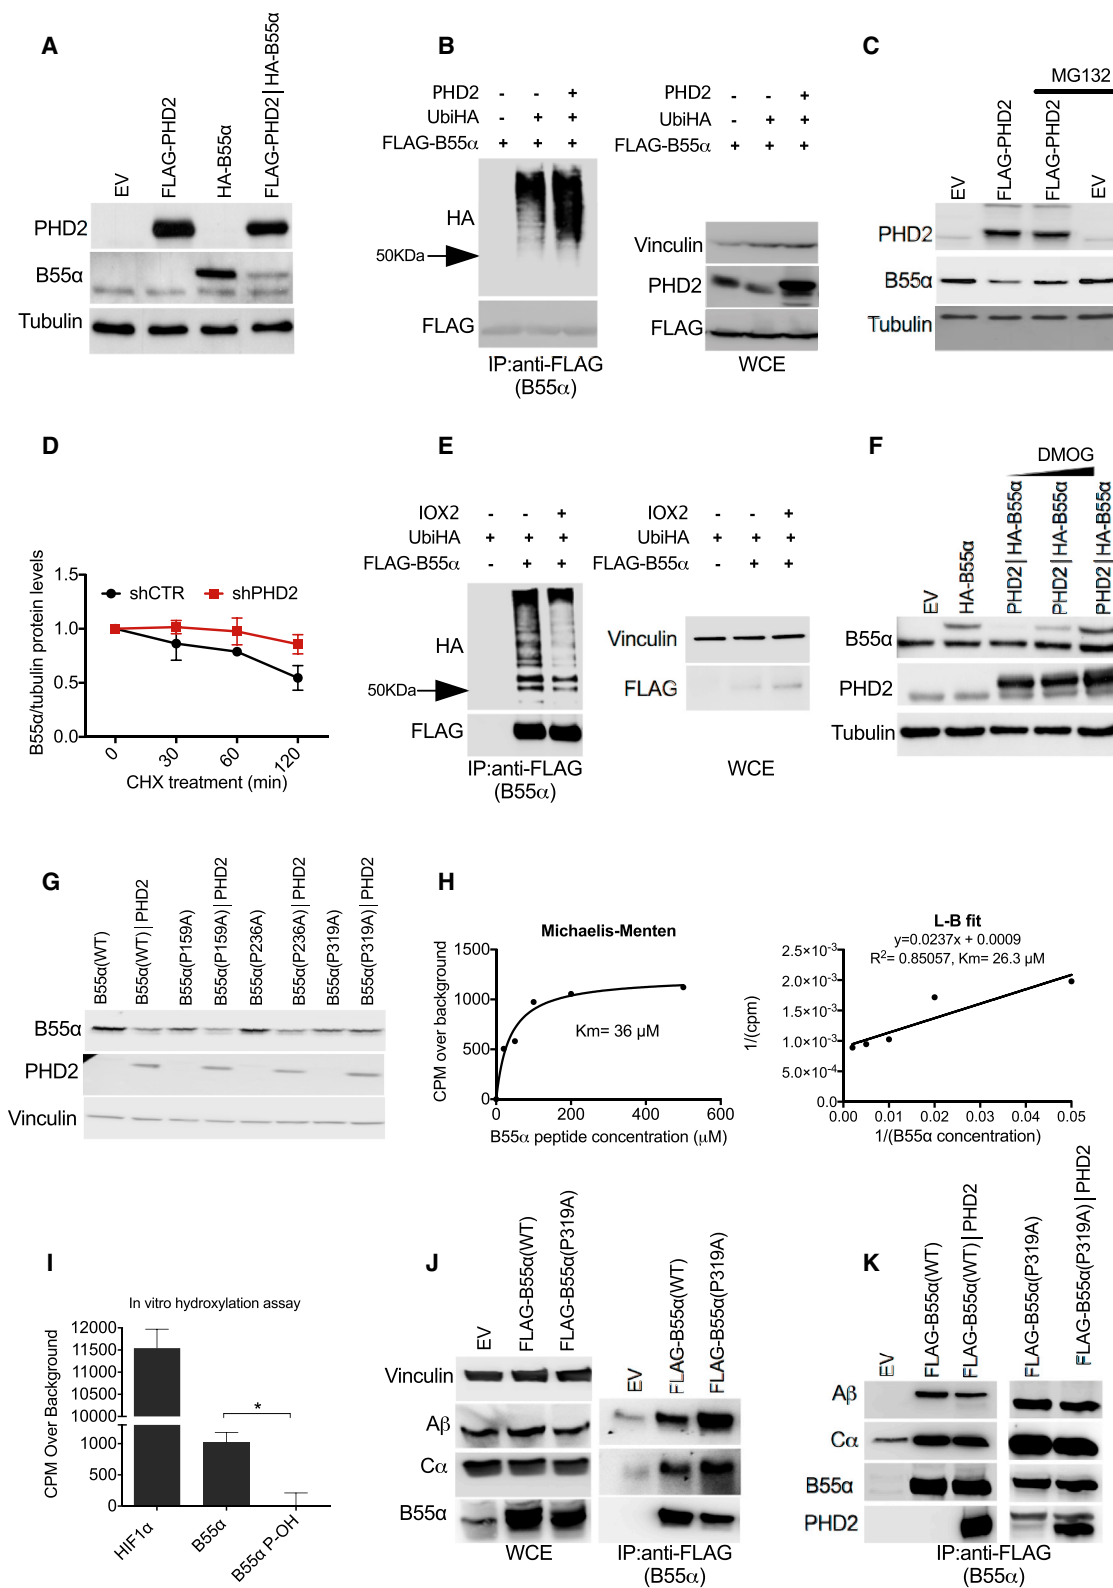

**Figure 1. PHD2 Induces Ubiquitination and Degradation of B55α**

(A) HEK293T cells were transfected with plasmids encoding for nothing (EV [empty vector]), B55α, PHD2, or both. After 24 hr, whole-cell extracts (WCEs) were lysed and analyzed by western blot (WB).

(legend continued on next page)

### PHD2 Hydroxylates B55 $\alpha$ on Proline 319

Mass spectrometry analysis of B55 $\alpha$  isolated from HEK293T cells, upon co-expression of PHD2, revealed three hydroxylation sites in P159, P236, and P319 of B55 $\alpha$  that we singularly mutated into an alanine. Of the three B55 $\alpha$  point mutants, only B55 $\alpha$ <sup>P319A</sup> exhibited increased resistance to PHD2-mediated degradation (Figure 1G). To confirm that this residue is hydroxylated by PHD2, we performed an in vitro hydroxylation assay where recombinant PHD2 was incubated with increasing doses of a B55 $\alpha$  peptide and the  $K_m$  was determined by using a Michaelis-Menten curve or a Lineweaver-Burk (L-B) plot (Figure 1H). The same assay was then performed by using a B55 $\alpha$  peptide spanning from amino acid 311 to 329, therefore containing P319, or B55 $\alpha$  P-OH (where P319 is synthetically hydroxylated) and HIF1 $\alpha$  (556–575) peptides as negative and positive controls, respectively. This assay confirmed that PHD2 was able to directly hydroxylate B55 $\alpha$  in P319, although with a lower efficiency than for HIF1 $\alpha$  (Figure 1I). However, when we tested the ubiquitination levels of this mutant, we could not detect any difference (Figure S1E). Because proline 319 lies in the region of B55 $\alpha$  that allows its binding to the scaffold subunit of the PP2A complex (Li and Virshup, 2002), we hypothesized that the hydroxylation of this residue is important to detach B55 $\alpha$  from the complex, therefore making it more available for degradation. When measuring the binding of B55 $\alpha$ <sup>WT</sup> and B55 $\alpha$ <sup>P319A</sup> to the scaffold A $\beta$  and the catalytic C $\alpha$  subunits of the PP2A complex, we found that B55 $\alpha$ <sup>P319A</sup> had higher affinity for the complex than B55 $\alpha$ <sup>WT</sup> (Figure 1J). Moreover, recombinant PHD2 was able to reduce the binding of B55 $\alpha$ <sup>WT</sup> (but not of B55 $\alpha$ <sup>P319A</sup>) to the A subunit of PP2A complex (Figure 1K). Altogether, these data suggest that B55 $\alpha$  hydroxylation is important to disassemble the PP2A complex, rendering B55 $\alpha$  available for degradation.

### PHD2 Degrades B55 $\alpha$ and Induces Cell Death in Response to Glucose Deprivation

To analyze the degradation of endogenous B55 $\alpha$ , we silenced PHD2 in three breast cancer cell lines, MDA-MB231, MCF7,

and SKBR3. In all cell lines, we observed an increase of B55 $\alpha$  protein levels upon silencing of PHD2 (Figure 2A) that was not linked to an augmentation in the mRNA levels (Figures 2B and 2C). Contrariwise, overexpression of PHD2 could reduce endogenous B55 $\alpha$  protein levels (Figure S1F). Because a previous report has shown that B55 $\alpha$  plays an important role in response to nutrient deprivation (Reid et al., 2013), in order to investigate the biological readout of our findings, we cultured breast cancer cells in glucose-deprived medium at several time points. We observed that B55 $\alpha$  was progressively degraded (Figures 2D and 2E) and that, in the same conditions, silencing of PHD2 was able to rescue the degradation of B55 $\alpha$  (Figures 2F and 2G). Based on the observation that glucose starvation did not affect the overall levels of PHD2, we hypothesized that the deprivation of glucose might rather affect PHD2 activity. Accordingly, lack of glucose, by slowing down the tricarboxylic acid (TCA) cycle, would lead to a change in the amount of  $\alpha$ -KG, a co-substrate needed for PHD2 activity, as well as fumarate and succinate, two metabolites that inhibit PHD2 and derive from the oxidation of  $\alpha$ -KG in the TCA cycle (Isaacs et al., 2005; King et al., 2006). To test this hypothesis, we measured by mass spectrometry the levels of  $\alpha$ -KG, succinate, and fumarate upon glucose starvation. At all the time points tested, in both MDA-MB231 and MCF7 cells, the levels of fumarate rapidly declined, whereas succinate was not affected (Figures 2H and 2I). As a consequence, the  $\alpha$ -KG-to-fumarate ratio gradually and significantly increased, possibly playing in favor of PHD2 function (Figures 2J and 2K). To further explain why fumarate dropped more rapidly than  $\alpha$ -KG under glucose starvation, we analyzed the levels of malate (that generates from fumarate in the TCA cycle) and we measured the amount of  $\alpha$ -KG deriving from glutamine. In both cell lines, malate levels were tremendously reduced to a similar extent as observed for fumarate (Figures 2H and 2I). This, together with the fact that succinate levels were unaltered, suggests a block of succinate dehydrogenase (SDH) activity upon glucose starvation (Andreev et al., 2015). At least in MCF7, the amount of  $\alpha$ -KG coming from glutamine was increasing under

(B) HEK293T cells were transfected with FLAG-B55 $\alpha$  alone or in combination with plasmids carrying Ubiquitin-HA and with PHD2 or a control vector. After 16 hr, cells were treated with MG132 (10  $\mu$ M) for 4 hr, lysed, and immunoprecipitated using anti-FLAG M2 beads to detect Ubiquitin-HA. WB on WCEs is shown on the right.

(C) WB analysis of HEK293T cells transfected with B55 $\alpha$  alone or in combination with PHD2 and treated with MG132 (10  $\mu$ M) or vehicle for 8 hr.

(D) HEK293T cells stably expressing a shRNA specifically targeting PHD2 (shPHD2) or control (shCTR) were transfected with B55 $\alpha$ . Then, cells were treated with 100  $\mu$ g/mL cycloheximide for the indicated time points; WCEs were collected and analyzed by WB. The graph represents the quantification of three independent experiments.

(E) HEK293T cells were transfected with Ubiquitin-HA alone or in combination with FLAG-B55 $\alpha$  or control vector. After 8 hr, cells were treated with the PHD2 inhibitor IOX2 (50  $\mu$ M) for 16 hr and immunoprecipitated using anti-FLAG M2 beads to detect Ubiquitin-HA. WB on WCEs is shown on the right.

(F) HEK293T cells were transfected with B55 $\alpha$  alone or in combination with PHD2. After 24 hr, cells were incubated for 8 hr in the presence or absence of the PHD2 inhibitor DMOG (1 or 2 mM). Protein levels were analyzed by WB.

(G) WB analysis of HEK293T cells stably transfected with plasmids carrying wild-type B55 $\alpha$  (WT) or B55 $\alpha$  mutants (P159A, P236A, P319A) in the presence or absence of PHD2.

(H) In vitro hydroxylation assays were performed with increasing concentrations of a B55 $\alpha$  peptide (spanning from W311 to L329).  $K_m$  was determined by using Michaelis-Menten curve (left panel) or L-B plot (right panel).

(I) In vitro hydroxylation assays were performed on three different peptides: HIF1 $\alpha$  (556–575), B55 $\alpha$  (311–329), and B55 $\alpha$  P-OH (where P319 is hydroxylated). \* $p$  < 0.05 versus the other conditions. The graph shows the mean  $\pm$  SEM.

(J) HEK293T cells were transfected with either empty vector (EV), FLAG-B55 $\alpha$ <sup>WT</sup>, or FLAG-B55 $\alpha$ <sup>P319A</sup>. After 16 hr, cells were lysed and immunoprecipitated using anti-FLAG M2 beads to detect the A and C subunits of the complex PP2A. WB on whole-cell extracts (WCEs) is shown on the left.

(K) HEK293T cells were transfected with either empty vector (EV), FLAG-B55 $\alpha$ <sup>WT</sup>, or FLAG-B55 $\alpha$ <sup>P319A</sup>. Cell lysates expressing FLAG-B55 $\alpha$ <sup>WT</sup> or FLAG-B55 $\alpha$ <sup>P319A</sup> were incubated in vitro for 2 hr with recombinant PHD2. Then an anti-FLAG immunoprecipitation was performed in order to detect by WB the levels of the Ab subunit as readout of PP2A complex information.

See also Figure S1.

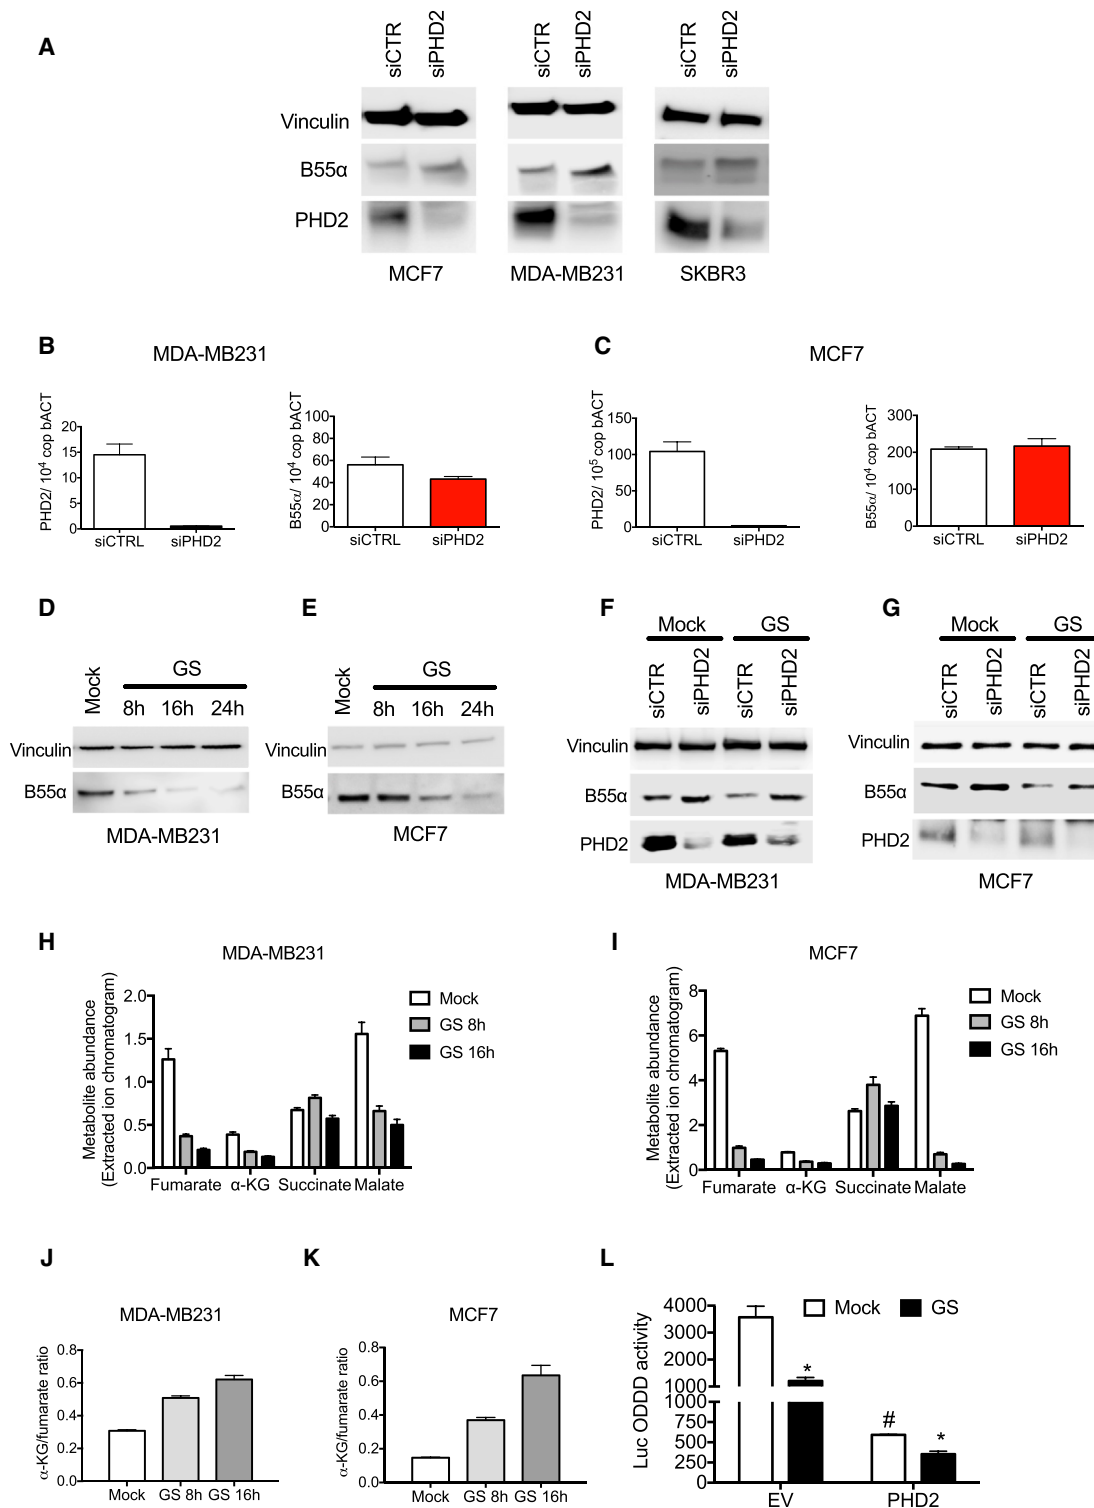

**Figure 2. PHD2 Depletion Prevents Degradation of B55α in Response to Glucose Starvation**

(A) WB analysis of MCF7, MDA-MB231, and SKBR3 cells transiently transfected with small interfering RNA (siRNA) specifically targeting PHD2 (siPHD2) or control (siCTR) for 48 hr.

(B and C) qPCR of RNA extracted from MDA-MB231 cells (B) and MCF7 cells (C) transfected with siRNA specifically targeting PHD2 (siPHD2) or control (siCTR).

(legend continued on next page)



glucose deprivation versus fed conditions, as evidenced by U-<sup>13</sup>C-glutamine fractional labeling (Figure S2A). Reductive carboxylation (RC), a pathway that utilizes glutamine-derived  $\alpha$ -KG to generate citrate and eventually acetyl-CoA (Metallo et al., 2011), was slightly but significantly decreased under glucose starvation as proven by a drop of the m + 1 acetyl-CoA isotopologue in the presence of 5-<sup>13</sup>C-glutamine (Figure S2B). Levels of glutamine-derived  $\alpha$ -KG were close to the detection limit in MDA-MB231 cells (not shown). Overall, our data indicate that, in the absence of glucose, at least in breast cancer cells, a block of SDH activity, per se or together with increased glutamine anaplerosis, results in a high  $\alpha$ -KG-to-fumarate ratio. These results prompted us to test how these metabolic changes affect PHD2 activity. We transfected fed and glucose-deprived MCF7 cells with a luciferase construct fused to the oxygen degradation domain of HIF1 $\alpha$  (ODDD-Luc). When active, PHD2 leads to the degradation of this ODDD-Luc, resulting in overall reduction of luciferase signal. During glucose starvation, the activity of both endogenous and overexpressed PHD2 was strongly increased (Figure 2L), and addition of fumarate to the medium was able to rescue this induction (Figure S2C), thus supporting that increased PHD2 activation in glucose starvation leads to B55 $\alpha$  degradation.

### Silencing of PHD2 Rescues B55 $\alpha$ Degradation and Overcomes Apoptosis in Response to Glucose Starvation

We then wondered whether the degradation of B55 $\alpha$  was necessary for the activation of survival/apoptotic pathways in response to nutrient deprivation (Sun et al., 2015). Cell-cycle analysis showed that deprivation of glucose induced a high percentage of cell death in both MDA-MB231 and MCF7 cell lines (Figure 3A). However, cells silenced for PHD2 showed 30% of reduction in cell death (Figures 3A–3C), whereas the cell-cycle phases were unchanged (Figures S2D and S2E). Furthermore, this protection against cell death was B55 $\alpha$  dependent because combined knockdown of B55 $\alpha$  and PHD2 was able to restore apoptosis in cells silenced for PHD2 only (Figures 3D, 3E, S2F, and S2G). Similarly to PHD2 silencing, overexpression of B55 $\alpha^{WT}$  or B55 $\alpha^{P319A}$  was able to induce protection against cell death as well (Figure 3F). Complementing these data, physiological expression of B55 $\alpha^{WT}$  in MCF7 silenced for PHD2 was able to reduce glucose starvation-induced cell death, whereas un-degradable B55 $\alpha^{P319A}$  was ineffective (Figure 3G). These data demonstrate that PHD2-mediated B55 $\alpha$  degradation is responsible, at least in part, for cell apoptosis induced by glucose deprivation.

Unlike MDA-MB231 and MCF7, SKBR3 cells were partially resistant to starvation-induced cell death. When SKBR3 cells were cultured in glucose-deprived medium, the protein levels of B55 $\alpha$  were unchanged and silencing of PHD2 did not significantly affect cell death (Figures 3H and 3I). Depletion of B55 $\alpha$  rendered these cells responsive to glucose deprivation and ultimately able to activate the apoptotic pathway (Figure 3J). In a focus-forming assay, glucose starvation partly decreased the number of colonies formed by control SKBR3 cells, but combined B55 $\alpha$  silencing resulted in a further and stronger reduction (Figures 4A and 4B), confirming the relevance of B55 $\alpha$  degradation in response to glucose starvation.

In order to test whether the molecular interaction between PHD2 and B55 $\alpha$  had relevance in an in vivo context, we injected subcutaneously MDA-MB231 cells stably silenced for CTRL (shCTRL) or PHD2 (shPHD2) in nude mice. When the tumors reached 50–100 mm<sup>3</sup>, we treated the mice with glycolysis inhibitor 2-DG (2-deoxy-glucose) (in order to mimic glucose starvation) or a vehicle control. In the presence of PHD2 (shCTRL), treatment with 2-DG blocks tumor growth with strong efficiency. However, when PHD2 is silenced (shPHD2), the tumors showed complete resistance to the treatment (Figures 4C and 4D). Consistent with our in vitro findings, the levels of B55 $\alpha$  were reduced in 2-DG-treated tumors, whereas this degradation was rescued in tumors lacking PHD2 (Figure 4E). Histological analysis of tumor sections revealed a strong increase of TUNEL positivity in 2-DG-treated cells that was completely canceled by silencing of PHD2, confirming the relevance of its activity in the response to glucose starvation (Figure 4F). Altogether, these data prove that PHD2-mediated B55 $\alpha$  degradation allows breast cancer cell death in response to chronic glucose deprivation.

## DISCUSSION

In this study, we uncover two molecular players in response to nutrient restriction: the phosphatase B55 $\alpha$ /PP2A and the prolyl-hydroxylase PHD2. The pathways involved in the response to nutrient deprivation have been widely investigated. In the absence of nutrients, the stress sensor AMPK is activated, leading to the inhibition of mTOR and the induction of a metabolic response able to initiate adaptation to nutrient restriction in order to allow the cell to survive in this harsh situation (Laplante and Sabatini, 2012). Although all of the kinases of this pathway have been studied for decades (Brown et al., 1994), the relevance of phosphatases in this matter has only recently received more attention (Reid et al., 2013; Wong et al., 2015).

(D and E) MDA-MB231 cells (D) and MCF7 cells (E) were cultured in complete (Mock) or glucose-deprived (GS) medium at the indicated time points. Then WCEs were collected and analyzed by WB.

(F and G) MDA-MB231 cells (F) and MCF7 cells (G) were transfected with siRNA targeting PHD2 (siPHD2) or control (siCTR). Cells were cultured in complete or glucose-deprived medium (GS) for 16 hr. WCEs were then collected and analyzed by WB.

(H–K) MDA-MB231 cells (H and J) and MCF7 cells (I and K) were cultured in complete (Mock) or glucose-deprived (GS) medium for the indicated time points. LC-MS was then performed for metabolite quantification on biological triplicates as described in Experimental Procedures. The  $\alpha$ -KG-to-fumarate ratio in MDA-MB231 or MCF7 cells is shown in (J) and (K), respectively.

(L) MCF7 were transfected with plasmids expressing ODDD (oxygen degradation domain) alone (EV) or together with PHD2 (PHD2). After 8 hr, medium was replaced with complete or glucose-deprived medium (GS) for 16 hr. Then cells were lysed and luciferase activity was measured and normalized for protein concentration. \*p < 0.05 versus other conditions; \*p < 0.05 versus Mock. All graphs show mean  $\pm$  SEM.

See also Figure S2.

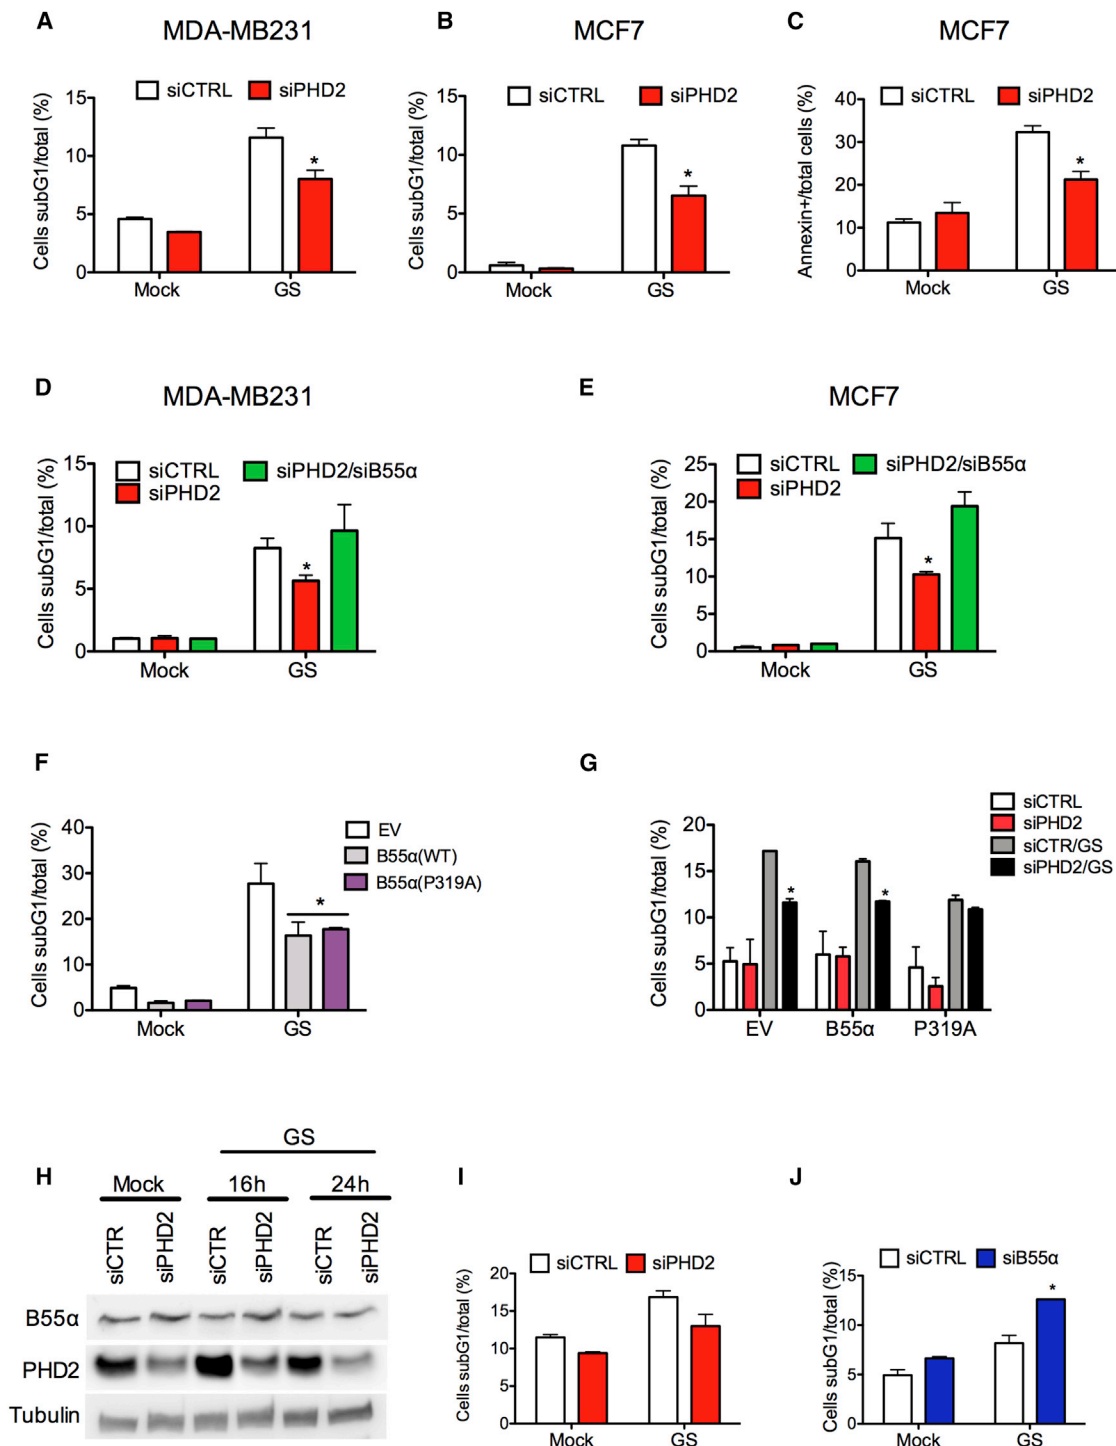

**Figure 3. PHD2 Depletion Promotes Resistance to Cell Death in Response to Glucose Starvation**

(A–C) MCF7 and MDA-MB231 cells were transfected with siRNA targeting PHD2 (siPHD2) or control (siCTRL). After 24 hr, cells were cultured in complete (Mock) or glucose-deprived (GS) medium for 24 hr. Cell death was assessed by propidium iodide (A and B) or Annexin V staining (C) and analyzed by FACS.

(D and E) MDA-MB231 cells (D) and MCF7 cells (E) were transfected with siRNA targeting control (siCTRL), PHD2 (siPHD2), or the combination of PHD2 and B55 $\alpha$  (siPHD2/siB55 $\alpha$ ). After 24 hr, cells were cultured in complete (Mock) or glucose-deprived (GS) medium. Cell death was assessed by propidium iodide staining at 24 hr. (F) MCF7 were transfected with plasmids encoding empty vector (EV), B55 $\alpha^{WT}$ , or B55 $\alpha^{P319A}$ . After 10 hr, cells were cultured in complete (Mock) or glucose-deprived (GS) medium. Cell death was assessed by propidium iodide staining at 16 hr.

(legend continued on next page)

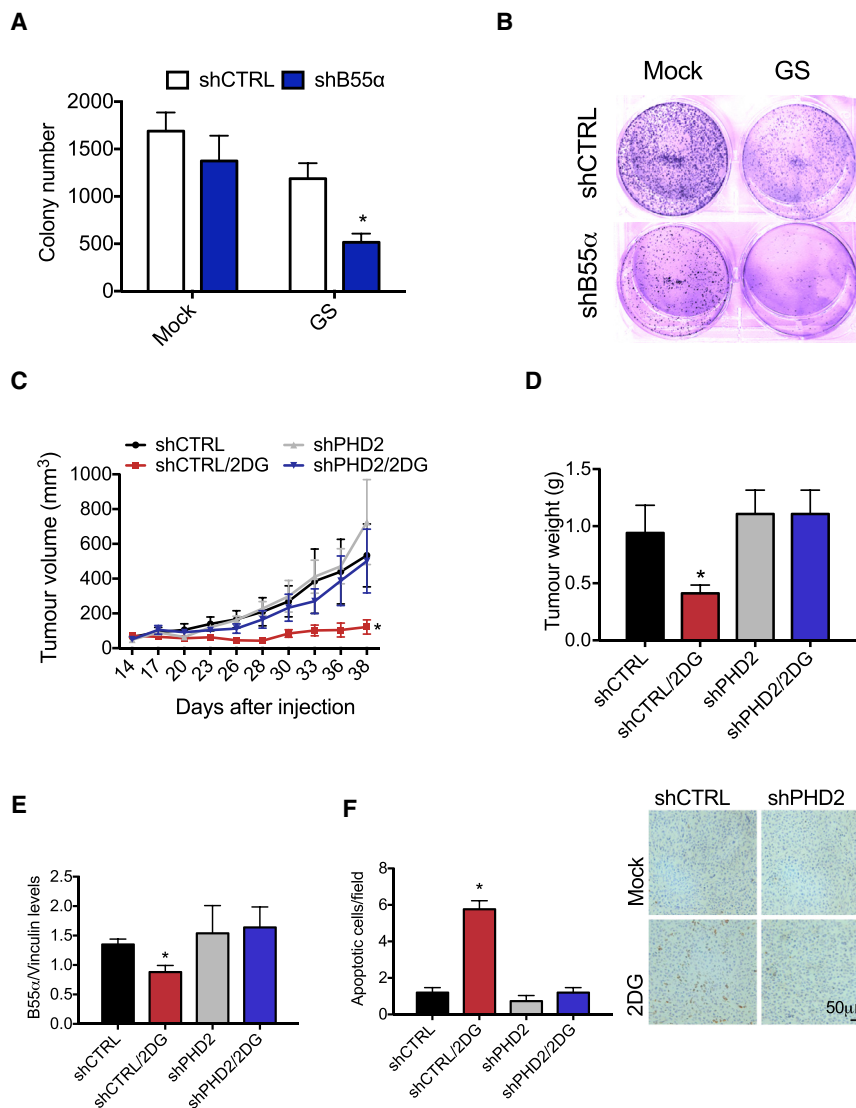

**Figure 4. Degradation of B55α by PHD2 Blocks Neoplastic Growth in Response to Glucose Deprivation**

(A and B) Colony-forming assay from SKBR3 cells stably silenced for B55α (shB55α) or control (shCTRL). Representative images from one of three independent experiments are shown (B).

(C) In vivo growth curve of xenograft tumors derived from subcutaneous injection of CD1 mice of MDA-MB231 cells stably silenced for control (shCTRL) or PHD2 (shPHD2).

(D) Graph shows tumor weight of MDA-MB231 cells 38 days after cancer cell injection.

(E) Graph shows quantification of B55α protein levels upon WB analysis of tumor samples derived from the experiment in (C).

(F) Morphometric quantification and representative images of TUNEL<sup>+</sup> apoptotic cells in MDA-MB231 tumor sections.

Representative images and morphometric quantification of MDA-MB231 tumor sections stained with TUNEL assay, showing cell death. \*p < 0.05 versus all other conditions in (A) and (C–F). All graphs show mean ± SEM.

response to glucose restriction is accomplished by degradation of PP2A/B55α. Induced prevention of its degradation (by silencing of PHD2) or impaired control of its levels, cause a resistance to cell death. It is thus possible that PP2A/B55α participates in a first-wave reaction in response to nutrient stress by controlling the phosphorylation cascade responsible for the growth arrest/survival of the cells. However, prolonged cell stress leads to the activation of apoptosis, signaled by a reduction in B55α levels that is mediated by PHD2. The role of PP2A in response to nutrient restriction has been highlighted by several studies

Upon nutrient starvation, PP2A activity is liberated as a consequence of mTOR repression, and this event leads to a PP2A-mediated block of c-myc that thus causes inhibition of proliferation (Cianfanelli et al., 2015; Di Conza et al., 2017). Moreover, the inactivation of mTOR and the simultaneous activation of PP2A/B55α are necessary to switch on the autophagic pathway in a very early response to amino acid deprivation (Wong et al., 2015). In this study, we have further investigated the link between PP2A/B55α and nutrient shortage, unravelling how a late

(Cianfanelli et al., 2015; Wong et al., 2015), and what is mostly emerging from all of them is the tight and reverse relationship between PP2A and mTOR signaling under starved conditions. Similarly, we have shown that hypoxic blockade of mTOR (via the upregulation of REDD1) releases PP2A/B55α activity, allowing dephosphorylation of PHD2 and full HIF1α stabilization (Di Conza et al., 2017). In the current report, we demonstrate that, in a feed-forward loop, PHD2 is able to harness its own inhibitor PP2A/B55α by inducing its hydroxylation, ubiquitination, and

(G) MCF7 were transfected with siRNA targeting PHD2 (siPHD2) or control (siCTRL). After 16 hr, cells were transfected with plasmids encoding empty vector (EV), B55α-WT, or B55α-P319A. After 10 hr, cells were cultured in complete (Mock) or glucose-deprived (GS) medium for 16 hr. Cell death was assessed by propidium iodide staining.

(H) SKBR3 cells were transfected with siRNA targeting PHD2 (siPHD2) or control (siCTRL). After 16 hr, cells were cultured in complete (Mock) or glucose-deprived (GS) medium for the indicated time points. WCEs were collected and analyzed by WB.

(I and J) SKBR3 cells were transfected with siRNA targeting PHD2 (siPHD2) and control (siCTRL) in (I) or with siRNA targeting B55α (siB55α) and control (siCTRL) in (J). Cell death was assessed by propidium iodide staining and FACS analysis after 24 hr in complete (Mock) or glucose-deprived (GS) medium. \*p < 0.05 versus siCTRL in (A–C); versus all other conditions in (D), (E), and (J); versus EV in (F); versus siCTRL/GS in (G). All graphs show mean ± SEM.

See also Figure S2.



degradation through the proteasome. These data indicate that B55 $\alpha$  is a substrate of the oxygen-sensing enzyme PHD2. However, different from what occurs for HIF1 $\alpha$ , the B55 $\alpha$  hydroxylation is not a signal for ubiquitin ligase, but it rather facilitates the detachment of B55 $\alpha$  from the main complex PP2A. Indeed, it has been demonstrated that the domain where the proline 319 lies, is involved in the binding with the scaffold A subunit (Li and Virshup, 2002). Therefore, the hydroxylation in proline 319 by inhibiting this binding favors B55 $\alpha$  ubiquitination and degradation. Several reports have highlighted the pro-tumoral activity of B55 $\alpha$  (Gilan et al., 2015; Hein et al., 2016; Reid et al., 2013). On the other hand, the role of PHD2 in cancer is more controversial, having shown even opposite effects in different tumor contexts (Chan et al., 2009; Klotzsche-von Ameln et al., 2011). Our data help to define the dual role of PHD2 in cancer. Together with hypoxia, nutrient restriction is a major feature of the tumor microenvironment. If, on one hand, we show that oxygen shortage enables B55 $\alpha$  accumulation, on the other hand, we speculate that in breast cancer cells glucose deprivation reduces the production of fumarate mainly because of a block of SDH (Andreev et al., 2015), tilting the balance toward an excess of  $\alpha$ -KG at the expense of the PHD2 inhibitor fumarate, overall resulting in enhanced PHD2 activity and increased B55 $\alpha$  degradation. In parallel, prolonged glucose starvation results in P70S6K reactivation (G.D.C. and M.M., unpublished data) that further boosts PHD2 function and therefore B55 $\alpha$  degradation (Di Conza et al., 2017). Yet, it remains to be defined how glucose starvation causes this SDH block in this specific cell context. Altogether, this study shows that PHD2 takes part in the network of nutrient-sensing proteins by regulating PP2A in breast cancer cells.

## EXPERIMENTAL PROCEDURES

More detailed methods can be found in [Supplemental Experimental Procedures](#).

### Cell Culture and Transfection

HEK293T, MCF7, MDA-MB231, and SKBR3 cell lines were cultured in DMEM (Gibco) supplemented with 10% heat-inactivated fetal bovine serum (FBS) (Gibco), 2 mM glutamine (Life Technologies), and 100 units/mL penicillin/100  $\mu$ g/mL streptomycin (Life Technologies). Cells were maintained in a humidified incubator at 37°C and 5% CO<sub>2</sub>. For glucose starvation experiments, DMEM glucose-free (Life Technologies) has been supplemented with heat-inactivated FBS previously dialyzed with slide A lyzer cassette (Thermo Scientific). Transfections were performed with Lipofectamine 2000 Transfection Reagent or Lipofectamine RNAiMax (Life Technologies), according to the manufacturer's instructions.

### Mass Spectrometry of Polar Metabolites

Polar metabolites were extracted using a methanol-water extraction (Fendt et al., 2013). Following extraction, the extract was centrifuged for 10 min at 4°C at 20,000  $\times$  g, and the supernatant was transferred to MS vials. Measurements by gas chromatography (GC) or liquid chromatography (LC) were performed as described in [Supplemental Experimental Procedures](#).

### In Vitro Decarboxylation Assay

An in vitro decarboxylation assay was performed as previously published (Zheng et al., 2014) to assess the hydroxylation of a specific peptide by recombinant PHD2. The sequences of the peptides used are as follows: B55 $\alpha$  peptide, WDLNMENRNPVETYQVHEYL; B55 $\alpha$  P-OH peptide,

WDLNMENRNPVETYQVHEYL (# denotes hydroxylation); HIF1 $\alpha$  (556–575), DLDLEMLAPYIPMDDDFQLR.

### Xenograft Tumors

MDA-MB231 cells were harvested and single-cell suspensions of 10  $\times$  10<sup>6</sup> cells in 100  $\mu$ L of PBS and Matrigel solution (1:1) were injected subcutaneously into the flank of CD1 mice. Tumor volumes were measured three times a week with a caliper and calculated using the formula:  $V = \pi \times [d^2 \times D]/6$ , where  $d$  is the minor tumor axis and  $D$  is the major tumor axis. This study was approved by the institutional ethical commission at KU Leuven.

### Statistics

All statistical analyses were performed using GraphPad Prism software. Statistical significance was calculated by two-tailed unpaired t test with  $p < 0.05$  considered statistically significant. Western blots and FACS analysis are representative of three independent experiments. All graphs show mean values  $\pm$  SEM.

## SUPPLEMENTAL INFORMATION

Supplemental Information includes Supplemental Experimental Procedures and two figures and can be found with this article online at <http://dx.doi.org/10.1016/j.celrep.2017.02.081>.

## AUTHOR CONTRIBUTIONS

G.D.C. performed experimental design, experiments, acquisition of data, analysis and interpretation of data and wrote the manuscript. S.T.C. performed western blot experiments. X.Z. and Q.Z. performed in vitro decarboxylation assay. M.M. performed experimental design, conducted scientific direction, and wrote the manuscript.

## ACKNOWLEDGMENTS

The authors thank B. Meeusen, G. Manzella, J. Serneels, and A. Acosta Sanchez for technical assistance; A. Sablina for sharing plasmids and reagents; and C. Frezza, B. Ghesquière, J. Aragonès, and K. De Bock for constructive discussion and advice. This work was supported by grants from FWO (1505611N00) and Stichting tegen Kanker (2010-169). G.D.C. is supported by a Pegasus FWO-Marie Curie Fellowship (1211413N); M.M. received an ERC Starting Grant (OxyMO, 308459).

Received: July 6, 2016

Revised: December 21, 2016

Accepted: February 28, 2017

Published: March 21, 2017

## REFERENCES

- Andreev, D.E., O'Connor, P.B., Zhdanov, A.V., Dmitriev, R.I., Shatsky, I.N., Papkovsky, D.B., and Baranov, P.V. (2015). Oxygen and glucose deprivation induces widespread alterations in mRNA translation within 20 minutes. *Genome Biol.* 16, 90.
- Brown, E.J., Albers, M.W., Shin, T.B., Ichikawa, K., Keith, C.T., Lane, W.S., and Schreiber, S.L. (1994). A mammalian protein targeted by G1-arresting rapamycin-receptor complex. *Nature* 369, 756–758.
- Chan, D.A., Sutphin, P.D., Yen, S.E., and Giaccia, A.J. (2005). Coordinate regulation of the oxygen-dependent degradation domains of hypoxia-inducible factor 1 alpha. *Mol. Cell. Biol.* 25, 6415–6426.
- Chan, D.A., Kawahara, T.L., Sutphin, P.D., Chang, H.Y., Chi, J.T., and Giaccia, A.J. (2009). Tumor vasculature is regulated by PHD2-mediated angiogenesis and bone marrow-derived cell recruitment. *Cancer Cell* 15, 527–538.
- Cianfanelli, V., Fuoco, C., Lorente, M., Salazar, M., Quondamatteo, F., Gherardini, P.F., De Zio, D., Nazio, F., Antonioli, M., D'Orazio, M., et al. (2015). AMBRA1 links autophagy to cell proliferation and tumorigenesis by promoting c-Myc dephosphorylation and degradation. *Nat. Cell Biol.* 17, 20–30.

- Di Conza, G., Trusso Cafarello, S., Loroch, S., Mennerich, D., Deschoemaeker, S., Di Matteo, M., Ehling, M., Gevaert, K., Prenen, H., Zahedi, R.P., et al. (2017). The mTOR and PP2A pathways regulate PHD2 phosphorylation to fine-tune HIF1 $\alpha$  levels and colorectal cancer cell survival under hypoxia. *Cell Rep.* **18**, 1699–1712.
- Epstein, A.C., Gleadle, J.M., McNeill, L.A., Hewitson, K.S., O'Rourke, J., Mole, D.R., Mukherji, M., Metzen, E., Wilson, M.I., Dhanda, A., et al. (2001). *C. elegans* EGL-9 and mammalian homologs define a family of dioxygenases that regulate HIF by prolyl hydroxylation. *Cell* **107**, 43–54.
- Fendt, S.M., Bell, E.L., Keibler, M.A., Davidson, S.M., Wirth, G.J., Fiske, B., Mayers, J.R., Schwab, M., Bellinger, G., Csibi, A., et al. (2013). Metformin decreases glucose oxidation and increases the dependency of prostate cancer cells on reductive glutamine metabolism. *Cancer Res.* **73**, 4429–4438.
- Gilan, O., Diesch, J., Amalia, M., Jastrzebski, K., Chueh, A.C., Verrills, N.M., Pearson, R.B., Mariadason, J.M., Tulchinsky, E., Hannan, R.D., and Dhillon, A.S. (2015). PR55 $\alpha$ -containing protein phosphatase 2A complexes promote cancer cell migration and invasion through regulation of AP-1 transcriptional activity. *Oncogene* **34**, 1333–1339.
- Götz, J., Probst, A., Ehler, E., Hemmings, B., and Kues, W. (1998). Delayed embryonic lethality in mice lacking protein phosphatase 2A catalytic subunit Calpha. *Proc. Natl. Acad. Sci. USA* **95**, 12370–12375.
- Hein, A.L., Seshacharyulu, P., Rachagani, S., Sheinin, Y.M., Ouellette, M.M., Ponnusamy, M.P., Mumby, M.C., Batra, S.K., and Yan, Y. (2016). PR55 $\alpha$  subunit of protein phosphatase 2A supports the tumorigenic and metastatic potential of pancreatic cancer cells by sustaining hyperactive oncogenic signaling. *Cancer Res.* **76**, 2243–2253.
- Isaacs, J.S., Jung, Y.J., Mole, D.R., Lee, S., Torres-Cabala, C., Chung, Y.L., Merino, M., Trepel, J., Zbar, B., Toro, J., et al. (2005). HIF overexpression correlates with biallelic loss of fumarate hydratase in renal cancer: novel role of fumarate in regulation of HIF stability. *Cancer Cell* **8**, 143–153.
- Keith, B., Johnson, R.S., and Simon, M.C. (2011). HIF1 $\alpha$  and HIF2 $\alpha$ : sibling rivalry in hypoxic tumour growth and progression. *Nat. Rev. Cancer* **12**, 9–22.
- King, A., Selak, M.A., and Gottlieb, E. (2006). Succinate dehydrogenase and fumarate hydratase: linking mitochondrial dysfunction and cancer. *Oncogene* **25**, 4675–4682.
- Klotzsche-von Ameln, A., Muschter, A., Mamlouk, S., Kalucka, J., Prade, I., Franke, K., Rezaei, M., Poitz, D.M., Breier, G., and Wielockx, B. (2011). Inhibition of HIF prolyl hydroxylase-2 blocks tumor growth in mice through the anti-proliferative activity of TGF $\beta$ . *Cancer Res.* **71**, 3306–3316.
- Laplante, M., and Sabatini, D.M. (2012). mTOR signaling in growth control and disease. *Cell* **149**, 274–293.
- Li, X., and Virshup, D.M. (2002). Two conserved domains in regulatory B subunits mediate binding to the A subunit of protein phosphatase 2A. *Eur. J. Biochem.* **269**, 546–552.
- Louis, J.V., Martens, E., Borghgraef, P., Lambrecht, C., Sents, W., Longin, S., Zwaenepoel, K., Pijnenborg, R., Landrieu, I., Lippens, G., et al. (2011). Mice lacking phosphatase PP2A subunit PR61/B'delta (Ppp2r5d) develop spatially restricted tauopathy by deregulation of CDK5 and GSK3beta. *Proc. Natl. Acad. Sci. USA* **108**, 6957–6962.
- Metallo, C.M., Gameiro, P.A., Bell, E.L., Mattaini, K.R., Yang, J., Hiller, K., Jewell, C.M., Johnson, Z.R., Irvine, D.J., Guarente, L., et al. (2011). Reductive glutamine metabolism by IDH1 mediates lipogenesis under hypoxia. *Nature* **481**, 380–384.
- Reid, M.A., Wang, W.I., Rosales, K.R., Welliver, M.X., Pan, M., and Kong, M. (2013). The B55 $\alpha$  subunit of PP2A drives a p53-dependent metabolic adaptation to glutamine deprivation. *Mol. Cell* **50**, 200–211.
- Sablina, A.A., Hector, M., Colpaert, N., and Hahn, W.C. (2010). Identification of PP2A complexes and pathways involved in cell transformation. *Cancer Res.* **70**, 10474–10484.
- Sontag, E. (2001). Protein phosphatase 2A: the Trojan Horse of cellular signaling. *Cell. Signal.* **13**, 7–16.
- Sun, L., Song, L., Wan, Q., Wu, G., Li, X., Wang, Y., Wang, J., Liu, Z., Zhong, X., He, X., et al. (2015). cMyc-mediated activation of serine biosynthesis pathway is critical for cancer progression under nutrient deprivation conditions. *Cell Res.* **25**, 429–444.
- Varadkar, P., Despres, D., Kraman, M., Lozier, J., Phadke, A., Nagaraju, K., and Mccright, B. (2014). The protein phosphatase 2A B56 $\gamma$  regulatory subunit is required for heart development. *Dev. Dyn.* **243**, 778–790.
- Wong, P.M., Feng, Y., Wang, J., Shi, R., and Jiang, X. (2015). Regulation of autophagy by coordinated action of mTORC1 and protein phosphatase 2A. *Nat. Commun.* **6**, 8048.
- Zheng, X., Zhai, B., Koivunen, P., Shin, S.J., Lu, G., Liu, J., Geisen, C., Chakraborty, A.A., Moslehi, J.J., Smalley, D.M., et al. (2014). Prolyl hydroxylation by EglN2 destabilizes FOXO3a by blocking its interaction with the USP9x deubiquitinase. *Genes Dev.* **28**, 1429–1444.

**Cell Reports, Volume 18**

**Supplemental Information**

**PHD2 Targeting Overcomes Breast Cancer**

**Cell Death upon Glucose Starvation**

**in a PP2A/B55 $\alpha$ -Mediated Manner**

**Giusy Di Conza, Sarah Trusso Cafarello, Xingnan Zheng, Qing Zhang, and Massimiliano Mazzone**

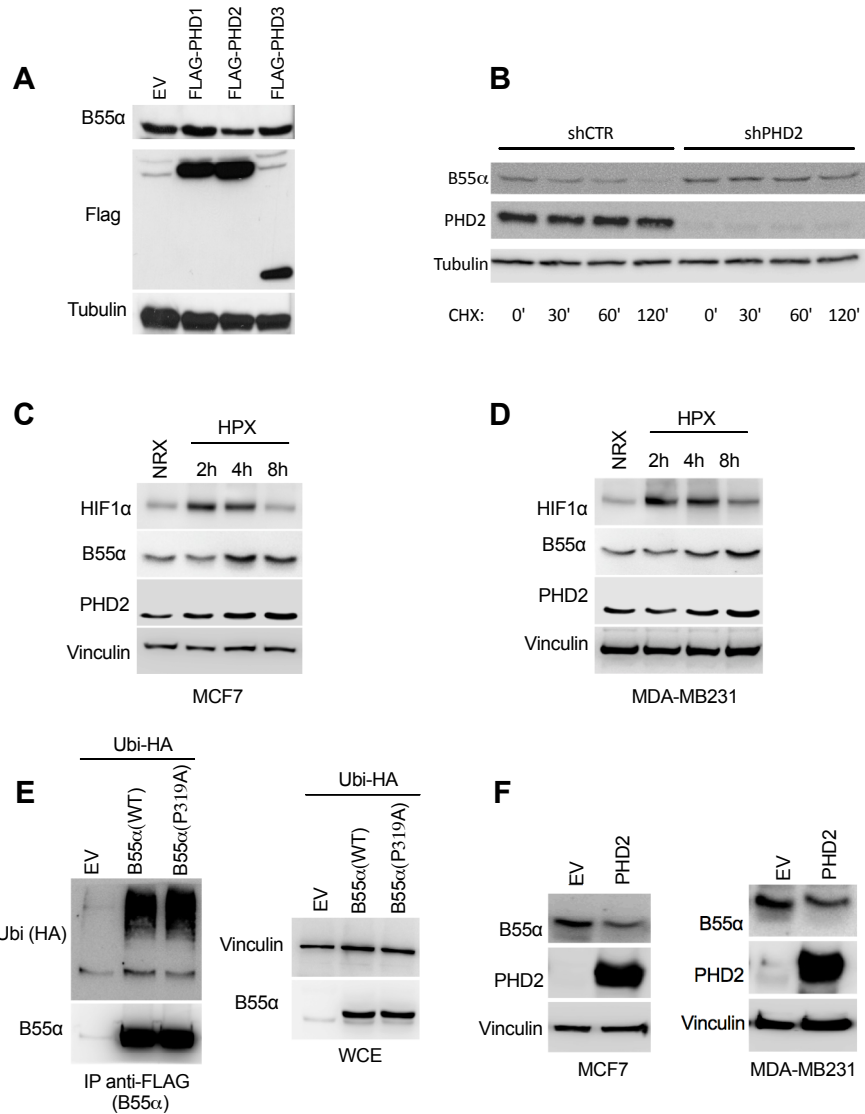

**Supplementary Figure S1. Related to Figure 1. PHD2 degrades B55α.** **A**, HEK293T cells were transfected with B55α alone or in combination with FLAG-PHD1, FLAG-PHD2 or FLAG-PHD3. After 24 hours, WCEs were collected and analyzed by WB. **B**, HEK293T cells stably expressing a shRNA specifically targeting PHD2 (shPHD2) or a scramble control (shCTR) were transfected with B55α. After 16 hours, cells were treated with 100 μg/ml cycloheximide for the indicated time points; WCEs were then collected and analyzed by WB. **C and D**, MCF7 (C) and MDA-MB231 (D) were incubated in hypoxia (HPX) or normoxia (NRX) for the indicated time points. WCE were collected and analyzed by WB. **E**, HEK293T cells were transfected with Ubiquitin-HA alone (EV) or in combination with FLAG-B55α(WT) or FLAG-B55α(P319A). After 16h transfection, cells were lysed and immunoprecipitated using anti-flag M2 beads to detect Ubiquitin-HA. WB on WCEs is shown on the right. **F**, MCF7 and MDA-MB231 were transfected with either an empty vector (EV) or PHD2. After 24 hours, cells were lysed and analyzed by WB.

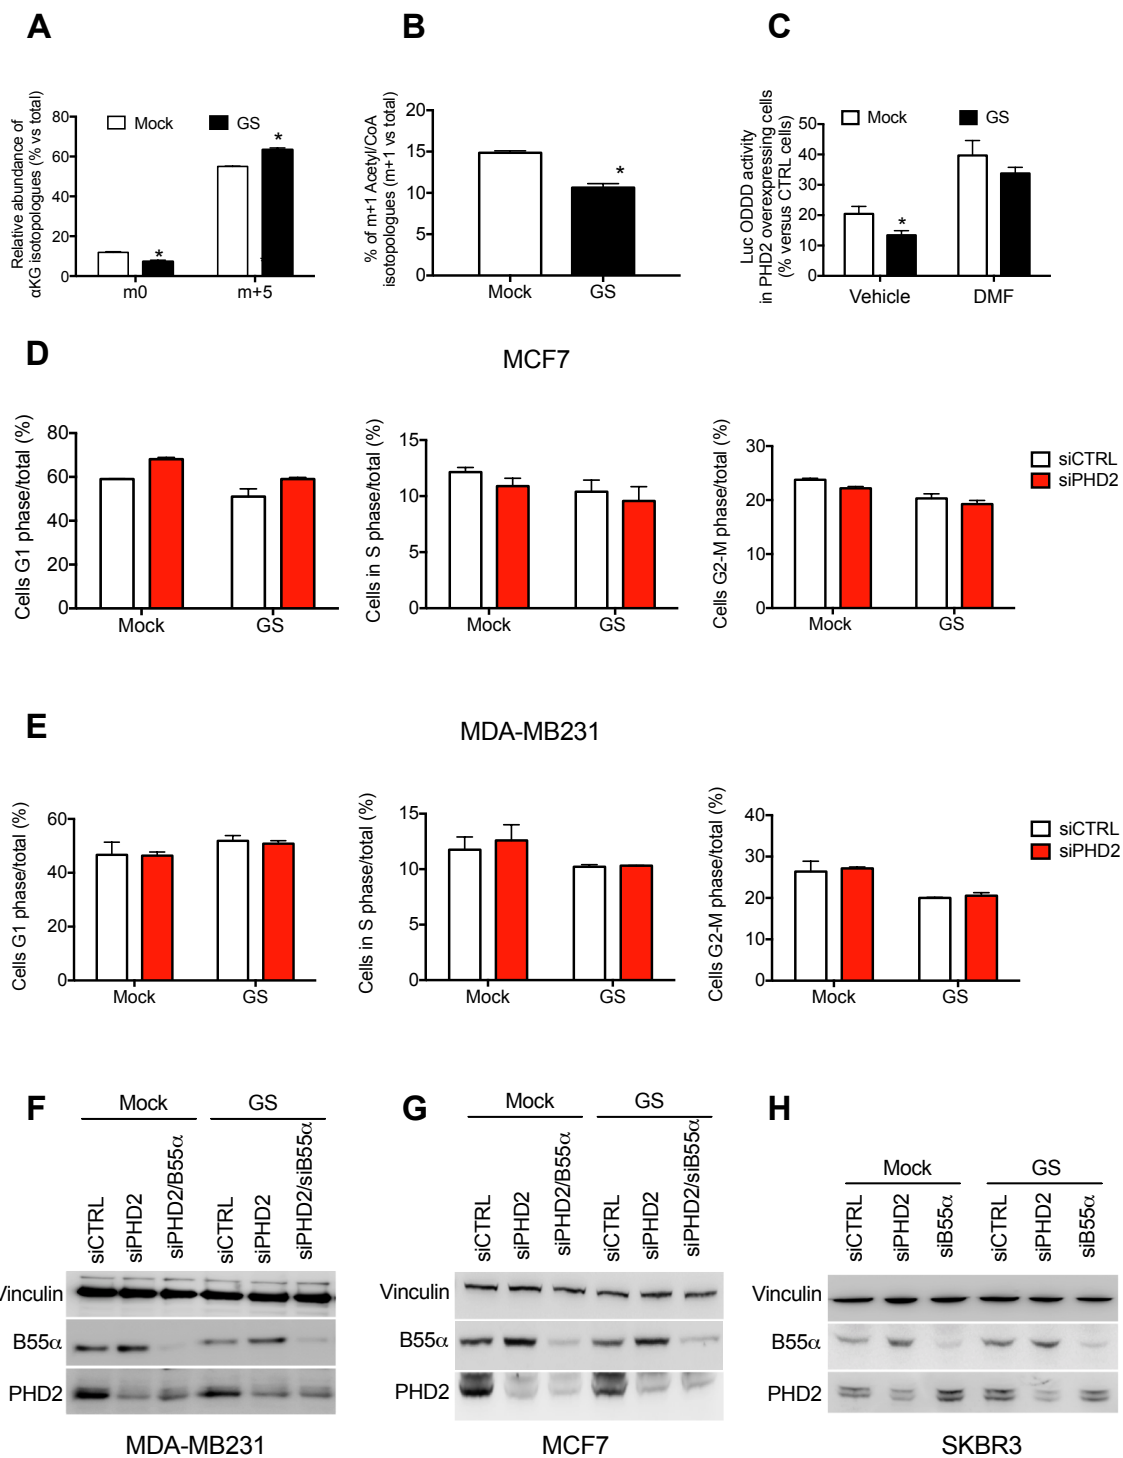



**Supplementary Figure S2. Related to Figure 2. In glucose starvation, PHD2 activity is increased and promotes B55 $\alpha$  degradation. A and B**, MCF7 cells were cultured in complete (Mock) or glucose deprived (GS) medium for 16h. In both growth media,  $^{12}\text{C}$ -glutamine (*i.e.* regular glutamine) was absent and replaced with either U- $^{13}\text{C}$ -glutamine (in A) or 5- $^{13}\text{C}$ -glutamine (in B). LC-MS was then performed on biological triplicates as described in the Experimental procedures in order to measure in A the levels of unlabeled  $\alpha$ -KG (m0, derived from carbon sources other than U- $^{13}\text{C}$ -glutamine) or labeled  $\alpha$ -KG (m+5, derived from U- $^{13}\text{C}$ -glutamine) and in B the levels of labeled Acetyl-CoA (m+1, derived from 5- $^{13}\text{C}$ -glutamine). **C**, MCF7 were transfected with plasmids expressing ODDD (oxygen degradation domain) alone (CTR) or together with PHD2 (PHD2). After 8 hours, cells were refreshed with complete (Mock) or glucose deprived (GS) medium in presence of vehicle or dymethyl-fumarate (DMF). After 16 hours, cells were lysed and luciferase activity was measured and normalized for protein concentration. **D and E**, MCF7 (D) and MDA-MB231 (E) cells were transfected with siRNA targeting PHD2 (siPHD2) or a scramble control (siCTR). After 16 hours, cells were cultured in complete (Mock) or glucose deprived (GS) medium for other 24 hours. Cell cycle phases were assessed by propidium iodide staining and FACS analysis. **F-H**, WB control of MDA-MB231 (F), MCF7 (G) and SKBR3 (H) used for FACS analysis in main figure 3D, 3E, 3I,J respectively. \*p<0.05 versus all other conditions in C. All graphs show mean  $\pm$  SEM.

## Supplemental Experimental Procedures

**Plasmids, siRNA and antibodies.** In the overexpression experiments the following plasmids were used: pcDNA3-PHD2-FLAG, pcDNA3-PHD1-FLAG, pcDNA3-PHD3-FLAG, pcDNA3 empty vector, pLA-B55 $\alpha$ -FLAG, pcDNA3-B55 $\alpha$ -HA, pLAB55 $\alpha$ (P136A), pLA-B55 $\alpha$ (P259A) and pLA-B55 $\alpha$ (P319A), pcDNA-UbiquitinHA. Commercially available siRNAs were purchased from Life Technologies and their sequences or assay IDs are listed below:

For B55 $\alpha$ : PPP2R2AHSS108370, PPP2R2AHSS108371 (used in combination);

For PHD2: EGLN1HSS123076, EGLN1HSS182577 (used in combination);

For scramble: Stealth RNAi™ siRNA Negative Control Lo GC, 12935-200. All the B55 $\alpha$  mutants (B55 $\alpha$ <sup>P159A</sup>, B55 $\alpha$ <sup>P236A</sup>, B55 $\alpha$ <sup>P319A</sup>) were generated by using QuikChange II XL Site-Directed Mutagenesis (Promega), according to manufacturer's instructions.

The following forward (Fw) and reverse (Rv) primers were respectively used:

P159A Fw: 5'GAGTGCCAGTCTTTAGGGCTATGGATCTAATGGTTG3', Rv: 5'CAACCATTAGATCCATAGCCCTAAAGACTGGCACTC3';

P236A Fw: 5'CAGCAGCAGAATTTTCATGCAAACAGCTGTAACAC3', Rv: 5'GTGTTACAGCTGTTTGCATGAAATTCTGCTGCTG3';

P319A Fw: 5'CTTAAATATGGAAAACAGGGCTGTGGAAACATACCAGGTG3', Rv: 5'CACCTGGTATGTTTCCACAGCCCTGTTTTCCATATTTAAG3'.

To generate stable knockdown MDA-MB231 cells, mir-155 miRNA/microRNA lentiviral vectors (shPHD2 and respective scramble (SIMA)) carrying the following shRNA were used:

For PHD2:

TGCTGTCAACATGACGTACATAACCCGTTTTGGCCACTGACTGACGGGTTATG  
CGTCATGTTGA

For the SIMA:

TGCTGCATGAATATCTCTGTCTCCTTGTTTTGGCCACTGACTGACAAGGAGAC  
AGATATTCATG.

For western blot analysis, the following antibodies were used: PPP2R2A (B55 $\alpha$ ) (Clone 2G9, Cell Signaling); PP2A, A $\beta$  subunit (Santa Cruz Technology); PP2A, C $\alpha$  subunit (Santa Cruz Technology); EGLN1 (human PHD2) (NB-100-137, Novus Biological); Vinculin (Monoclonal anti-Vinculin, V9131, SIGMA Aldrich); Tubulin (HRP-conjugated anti-beta-tubulin, Abcam); FLAG (Monoclonal anti-FLAG, SIGMA Aldrich).

**Western Blot analysis.** Protein extraction of both cell or tumor samples was performed by using RIPA lysis buffer (50 mM Tris HCl pH 8, 150 mM NaCl, 1% Triton X-100, 0.5% sodium deoxycholate, 0.1% SDS) supplemented with Complete Protease Inhibitor Cocktail (Roche) and PhosSTOP phosphatase inhibitor (Roche). Lysates were incubated on ice for 30 minutes before centrifuging 15 minutes at 4°C to remove cellular debris. Supernatants were subsequently collected. Protein concentration of cell extracts was determined by using bicinchoninic acid (BCA) reagent (Pierce) according to the manufacturer's instructions. Protein samples were denatured by adding loading buffer 6X ( $\beta$ -mercaptoethanol 0,6 M; SDS 8%; Tris-HCl 0,25 M pH 6,8; glycerol 40%; Bromophenol Blue 0,2%), incubated at 95°C for 5 minutes. After electrophoresis, proteins were transferred onto a nitrocellulose membrane using the iBlot® Dry Blotting System (Invitrogen) according to manufacturer's instructions. The membranes were blocked for non-specific binding in 5% non-fatty dry milk in Tris Buffered Saline-Tween

0.1 % (50 mM Tris HCl pH 7.6, 150 mM NaCl, 0.1% Tween; TBS-T) for 1h at room temperature (RT) and incubated with primary antibody for 2h at RT or overnight (ON) at 4°C. After incubation with the indicated primary antibodies, the membranes were washed for 15 minutes in TBS-T and incubated with secondary antibody (1/5000 in 5% non fatty dry milk in TBS-T) for 50 minutes at RT. The following secondary antibodies were used: goat anti-mouse and goat anti-rabbit (Santa Cruz biotechnology). The signal was visualized with Enhanced Chemiluminescent Reagents (ECL; Invitrogen) or SuperSignal West Femto Chemiluminescent Substrate (Thermo Scientific) with a digital imager (ImageQuant LAS 4000, GE Health Care Life Science Technologies).

**Mass Spectrometry.** To identify B55 $\alpha$  hydroxylation sites, overexpression of the FLAG-tagged protein of interest has been performed in HEK293T cells. Cells were harvested, lysed in extraction buffer and 3 mg of total protein extract was used for immunoprecipitation using anti-FLAG M2 affinity beads, according to protocol (Sigma-Aldrich). Immunoprecipitated proteins were separated by SDS-PAGE and stained using Coomassie. Gel bands of interest were excised and washed several times with water and acetonitrile, and completely dried in a SpeedVac. Subsequently, an in-gel trypsin digest was performed using sequence-grade modified trypsin, porcine (Promega, Madison, WI USA) and samples were incubated overnight at 37°C. The supernatants containing the peptides were then isolated, transferred to MS-compatible vials and acidified with trifluoroacetic acid (TFA) (pH < 3). The obtained peptide mixtures were introduced into an LC-MS/MS system; the Ultimate 3000 RSLC nano (Dionex, Amsterdam, The Netherlands) in-line connected to an LTQ Orbitrap Velos (Thermo Fisher Scientific, Bremen, Germany) for analysis. Peptides were first loaded on a trapping column (made

in-house, 100 mm internal diameter (I.D.) x 20 mm, 5 mm C18 Reprosil-HD beads, Dr. Maisch, Ammerbuch-Entringen, Germany). After back-flushing from the trapping column, the sample was loaded on a reverse-phase column (made in-house, 75 µm I.D. x 150 mm, 3 µm C18 Reprosil-HD beads, Dr. Maisch). Peptides were loaded with solvent A (0.1% TFA, 2% acetonitrile) and separated with a linear gradient from 98% solvent A' (0.1% formic acid in water) to 55% solvent B' (0.1% TFA, 80% ACN) at a flow rate of 300 nl/min followed by a wash reaching 100% solvent B'. The mass spectrometer was operated in data-dependent mode, automatically switching between MS and MS/MS acquisition for the ten most abundant peaks in a given MS spectrum. In the LTQ-Orbitrap Velos, full scan MS spectra were acquired in the Orbitrap at a target value of 1E6 with a resolution of 60,000. The ten most intense ions were then isolated for fragmentation in the linear ion trap, with a dynamic exclusion of 40 s. Peptides were fragmented after filling the ion trap at a target value of 1E4 ion counts. From the MS/MS data in each LC run, Mascot Generic Files were created using Distiller software (version 2.4.3.3, Matrix Science, [www.matrixscience.com/Distiller](http://www.matrixscience.com/Distiller)). While generating these peak lists, grouping of spectra was allowed in Distiller with a maximum intermediate retention time of 30 s and a maximum intermediate scan count of 5 was used where possible. Grouping was done with 0.005 Da precursor tolerance. A peak list was only generated when the MS/MS spectrum contained more than 10 peaks. There was no deisotoping and the relative signal to noise limit was set at 2. These peak lists were then searched with Mascot search engine (MatrixScience) using the Mascot Daemon interface (version 2.3.01, Matrix Science). Spectra were searched against the Swiss-Prot database restricted to *Homo sapiens* (SwissProt 2012\_04, 20.324 protein sequences). Variable modifications were set to pyro-



glutamate formation of amino-terminal glutamine, acetylation of the protein N-terminus, oxidation of methionine, hydroxylation of proline, propionamidation of cysteine. Tolerance on precursor ions was set to  $\pm 10$  ppm (with Mascot's C13 option set to 1) and on fragment ions to  $\pm 0.5$  Da. The peptide charge was set to 2+, 3+, and the instrument setting was put on ESI-TRAP. Enzyme was set to trypsin, allowing for one missed cleavage, also cleavage was allowed when arginine or lysine is followed by proline. Only peptides that were ranked one and scored above the threshold score, set at 99% confidence, were withheld. All data management was done by ms\_lims (PMID: 20058248).

**Liquid chromatography mass spectrometry.** Polar metabolites were measured by using a Dionex UltiMate 3000 LC System (Thermo Scientific) in-line connected to a Q-Exactive Orbitrap mass spectrometer (Thermo Scientific). 20  $\mu$ l of sample was injected and loaded onto a Hilicon iHILIC-Fusion(P) column (Achrom). A linear gradient was carried out starting with 90% solvent A (LC-MS grade acetonitrile) and 10% solvent B (10 mM ammoniumacetate pH 9.3). From 2 to 20 minutes the gradient changed to 80% B and was kept at 80% until 23 min. Next a decrease to 40% B was carried out to 25 min, further decreasing to 10% B at 27 min. Finally 10% B was maintained until 35 min. The solvent was used at a flow rate of 200  $\mu$ l/min, the columns temperature was kept constant at 25 degrees Celsius. The mass spectrometer operated in negative ion mode, settings of the HESI probe were as follows: sheath gas flow rate at 35, auxiliary gas flow rate at 5 (at a temperature of 260 degrees Celsius). Spray voltage was set at 4.8 kV, temperature of the capillary at 300 degrees Celsius and S-lens RF level at 50. A full scan (resolution of 140.000 and scan range of m/z 50-1050) was applied. Data was processed using Thermo

Quan software (XCalibur, Thermo Scientific). Abundance of metabolites is expressed as extracted ion chromatogram (EIC).

**Gas chromatography mass spectrometry.** To the dried fractions 20  $\mu$ l of Mox solution (2%, methoxyamine hydrochloride) was added, the reaction was carried out for 90 min at 37°C. Next, 50  $\mu$ L of TBDMS (N-tert-Butyldimethylsilyl-N-methyltrifluoroacetamide with 1% tert-Butyldimethylchlorosilane) was added for 60 min at 60°C. The reaction mixtures were centrifuged for 15 min at 20.000 x g and the supernatant was transferred to Agilent glass vials with conical inserts. GC-MS analyses were performed using an Agilent 7890A GC equipped with a HP-5 ms 5% Phenyl Methyl Silox (30 m - 0.25 mm i.d. - 0.25  $\mu$ m; Agilent Technologies, Santa Clara, California, USA) capillary column, interfaced with a triple quadrupole tandem mass spectrometer (Agilent 7000B, Agilent Technologies) operating under ionization by electron impact at 70 eV. The injection port, interface and ion source temperatures were kept at 230 °C. Temperature of the quadrupoles was maintained at 150°C. The injection volume was 1  $\mu$ l, and samples were injected at 1:5 split ratio. Helium flow was kept constant at 1 ml/min. The temperature of the column started at 90 °C for 5 min and increased to 150 °C at 10 °C/min, to 270 °C at 20 °C/min, and to 300°C at 30 °C/min. Next, column regeneration was carried out for 3 min at 325°C. The GC/MS/MS analyses were performed in Multiple Reaction Monitoring (MRM) mode. Data analysis was performed using the Agilent Masshunter Quan software. Abundances of metabolites are expressed as area under the curve.

**Data Analysis <sup>13</sup>C tracer experiments.** Correction for natural isotope abundances was carried out as described by Fernandez et al., 1996 (Fernandez et al., 1996) and fractional

labeling was calculated by using an *in-house* software tool as previously described (Buescher et al., 2015).

**Quantitative Real Time Polymerase Chain Reaction (qRT-PCR).** To assess gene expression, RNA from MCD-MB231 seeded in triplicate in 12-well plates was extracted with a RNeasy Mini kit (Qiagen) according to manufacturer's instructions. Reverse transcription to cDNA was performed by using Quantitect Reverse Transcription Kit (Qiagen) according to manufacturer's protocol. cDNA, primer/probe mix and TaqMan Fast Universal PCR Master Mix were prepared in a volume of 10 µl according to manufacturer's instructions (Applied Biosystems). qRT-PCR was performed in an Applied Biosystems 7500 Fast Real-Time PCR system. Pre-made assays were purchased and their assay IDs are: PPP2R2A (B55α), Hs.PT.58.25465949 from IDT; bActin, Hs.PT.39a.22214847 from IDT; EGLN1 (PHD2): Hs00254393\_m1 from Applied Biosystem.

**FACS.** Supernatants from MCF7, MDA-MB231 and SKBR3 cells cultured in complete or glucose-free DMEM were collected in order to keep the floating dead cells. Adherent cells were subsequently trypsinized, added to the supernatant previously collected and centrifuged at 300g for 5 minutes. After one wash with PBS, cells were fixed with 1 ml of 70% ethanol. Cells were incubated 2h or overnight at 4°C, prior to another centrifugation at 300g for 5 minutes. Supernatant was removed and the pellet was resuspended in 200 µl of PBS, containing 500 µg of RNase (10 mg/ml). 200 µl of Propidium Iodide (0,1mg/ml) was added to a final volume of 400 µl. Samples were incubated for 1-2 h at 37°C and subsequently analyzed by Fluorescence-Activated Cell Sorting by using FACS Verse (BD Bioscience).

**Histology.** To obtain serial 7- $\mu$ m-thick sections, tissue samples fixed in 2% PFA overnight at 4°C, dehydrated and embedded in paraffin. Paraffin slides were first rehydrated to further proceed with antigen retrieval in citrate solution (DAKO). Apoptotic cells were detected by the TUNEL method, using the ApopTag peroxidase in situ apoptosis detection kit (Millipore) according to the manufacturer's instructions. Microscopic analysis was done with an Olympus BX41 microscope and CellSense imaging software. The analysis was performed by acquiring 4-6 fields per sections on 5 independent sections from the same biological tissue sample. The values in the graphs represent the average of the means of, at least, 5 samples and the standard error indicates the variability among the different samples.

## Supplemental References

Buescher, J.M., Antoniewicz, M.R., Boros, L.G., Burgess, S.C., Brunengraber, H., Clish, C.B., DeBerardinis, R.J., Feron, O., Frezza, C., Ghesquiere, B., *et al.* (2015). A roadmap for interpreting  $^{13}\text{C}$  metabolite labeling patterns from cells. *Curr Opin Biotechnol* *34*, 189-201.

Fernandez, C.A., Des Rosiers, C., Previs, S.F., David, F., and Brunengraber, H. (1996). Correction of  $^{13}\text{C}$  mass isotopomer distributions for natural stable isotope abundance. *J Mass Spectrom* *31*, 255-262.
